# Supplementary material for: Association between Exposure to Ambient Air Pollution and Rheumatoid Arthritis in Adults
Source: MDPI journal article supplement (doi:10.3390/ijerph16071227), 2019-04-06
Supplement: s1 [file s1]

**Table S1.** Conditional logistic regression results from the single- and multi-pollutant models for adjusted associations between two- to three-year air pollutant concentrations and rheumatoid arthritis in adults <sup>a</sup> ( $n = 2220$ ).

| Air Pollutant                         | Single-Pollutant Models |                  | Multi-Pollutant Models |                  |
|---------------------------------------|-------------------------|------------------|------------------------|------------------|
|                                       | Quartile <sup>b</sup>   | OR (95% CI)      | Quartile <sup>b</sup>  | OR (95% CI)      |
| <b>2-Year Concentration</b>           |                         |                  |                        |                  |
| O <sub>3</sub> (ppb)                  | 2                       | 0.91 (0.66–1.24) | 2                      | 0.75 (0.48–1.18) |
|                                       | 3                       | 1.48 (1.10–1.99) | 3                      | 1.09 (0.65–1.81) |
|                                       | 4                       | 1.18 (0.87–1.59) | 4                      | 0.82 (0.45–1.49) |
| PM <sub>10</sub> (µg/m <sup>3</sup> ) | 2                       | 0.79 (0.59–1.06) | 2                      | 0.89 (0.63–1.27) |
|                                       | 3                       | 0.72 (0.54–0.97) | 3                      | 0.80 (0.54–1.19) |
|                                       | 4                       | 0.83 (0.63–1.11) | 4                      | 0.90 (0.59–1.37) |
| CO (ppb)                              | 2                       | 1.41 (1.05–1.90) | 2                      | 1.61 (1.15–2.25) |
|                                       | 3                       | 1.37 (1.01–1.86) | 3                      | 1.53 (1.01–2.31) |
|                                       | 4                       | 1.13 (0.82–1.54) | 4                      | 1.49 (0.90–2.47) |
| NO <sub>2</sub> (ppb)                 | 2                       | 0.97 (0.73–1.30) | 2                      | 0.90 (0.62–1.31) |
|                                       | 3                       | 1.04 (0.78–1.39) | 3                      | 0.93 (0.57–1.51) |
|                                       | 4                       | 0.76 (0.56–1.03) | 4                      | 0.71 (0.36–1.37) |
| SO <sub>2</sub> (ppb)                 | 2                       | 0.64 (0.47–0.85) | 2                      | 0.65 (0.45–0.94) |
|                                       | 3                       | 0.69 (0.52–0.91) | 3                      | 0.74 (0.48–1.14) |
|                                       | 4                       | 0.72 (0.54–0.96) | 4                      | 0.81 (0.55–1.19) |
| <b>3-Year Concentration</b>           |                         |                  |                        |                  |
| O <sub>3</sub> (ppb)                  | 2                       | 0.88 (0.64–1.20) | 2                      | 0.64 (0.41–1.00) |
|                                       | 3                       | 1.24 (0.92–1.67) | 3                      | 0.78 (0.48–1.26) |
|                                       | 4                       | 1.18 (0.88–1.58) | 4                      | 0.65 (0.37–1.15) |
| PM <sub>10</sub> (µg/m <sup>3</sup> ) | 2                       | 0.73 (0.55–0.99) | 2                      | 0.84 (0.60–1.18) |
|                                       | 3                       | 0.84 (0.63–1.13) | 3                      | 1.02 (0.70–1.48) |
|                                       | 4                       | 0.84 (0.63–1.11) | 4                      | 0.99 (0.68–1.44) |
| CO (ppb)                              | 2                       | 1.42 (1.06–1.91) | 2                      | 1.49 (1.08–2.05) |
|                                       | 3                       | 1.33 (0.98–1.80) | 3                      | 1.67 (1.06–2.63) |
|                                       | 4                       | 1.1 (0.80–1.51)  | 4                      | 1.63 (0.94–2.84) |
| NO <sub>2</sub> (ppb)                 | 2                       | 0.94 (0.70–1.25) | 2                      | 0.90 (0.60–1.37) |
|                                       | 3                       | 0.98 (0.74–1.30) | 3                      | 0.74 (0.42–1.30) |
|                                       | 4                       | 0.71 (0.52–0.96) | 4                      | 0.47 (0.22–0.97) |
| SO <sub>2</sub> (ppb)                 | 2                       | 0.66 (0.50–0.89) | 2                      | 0.71 (0.48–1.04) |
|                                       | 3                       | 0.66 (0.50–0.88) | 3                      | 0.72 (0.47–1.09) |
|                                       | 4                       | 0.70 (0.53–0.94) | 4                      | 0.79 (0.52–1.19) |

<sup>a</sup> Results adjusted for insurance type, body mass index (BMI), smoking status, alcohol consumption, and exercise status; <sup>b</sup> Results compared with the exposure in the lowest quartile (first quartile).

**Table S2.** Conditional logistic regression results from the two-pollutant models for adjusted associations between one-year CO and O<sub>3</sub> concentrations and rheumatoid arthritis in adults <sup>abc</sup> (*n* = 2220).

| <b>2-Year Concentration</b> | <b>Quartile <sup>b</sup></b> | <b>OR (95% CI)</b> |
|-----------------------------|------------------------------|--------------------|
| O <sub>3</sub>              | 2                            | 0.93 (0.68–1.29)   |
|                             | 3                            | 1.57 (1.15–2.14)   |
|                             | 4                            | 1.45 (1.01–2.07)   |
| CO                          | 2                            | 1.59 (1.16–2.18)   |
|                             | 3                            | 1.60 (1.14–2.25)   |
|                             | 4                            | 1.42 (0.98–2.04)   |
| <b>3-Year Concentration</b> |                              |                    |
| O <sub>3</sub>              | 2                            | 0.92 (0.66–1.28)   |
|                             | 3                            | 1.33 (0.95–1.86)   |
|                             | 4                            | 1.41 (0.97–2.04)   |
| CO                          | 2                            | 1.49 (1.10–2.01)   |
|                             | 3                            | 1.59 (1.13–2.26)   |
|                             | 4                            | 1.37 (0.94–2.00)   |

<sup>a</sup>Results adjusted for insurance type, body mass index (BMI), smoking status, alcohol consumption, and exercise status; <sup>b</sup> Results compared with the exposure in the lowest quartile (first quartile); <sup>c</sup> Two-pollutant model: CO + O<sub>3</sub>.
